# Supplementary material for: Anthropogenic CO 2 , air–sea CO 2 fluxes, and acidification in the Southern Ocean: results from a time-series analysis at station OISO-KERFIX (51° S–68° E)
Source: Copernicus journal article supplement (doi:10.5194/os-20-725-2024), 2024-06-11
Supplement: Supplementary file 1 [file os-20-725-2024-supplement.pdf]

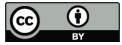

*Supplement of*

**Anthropogenic CO<sub>2</sub>, air–sea CO<sub>2</sub> fluxes, and acidification in the Southern Ocean: results from a time-series analysis at station OISO-KERFIX (51° S–68° E)**

**Nicolas Metzl et al.**

*Correspondence to:* Nicolas Metzl ([nicolas.metzl@locean.ipsl.fr](mailto:nicolas.metzl@locean.ipsl.fr))

The copyright of individual parts of the supplement might differ from the article licence.

This document includes Tables S1-S5 and Figures S1-S18 providing the supplementary information that supports part of the discussion presented in the main article.

Table S1a: List of stations occupied at OISO-KERFIX location (50°40'S-68°25'E) with A<sub>T</sub>-C<sub>T</sub> data used in this analysis. \* indicates data from GLODAP data product version v2021 (Lauvset et al, 2021). Cruises OISO-21 to OISO-31 will be available in version GLODAP-V3. PI stands for Principal Investigator.

| Cruise    | Ship               | Year | Month | Day | PI                    |
|-----------|--------------------|------|-------|-----|-----------------------|
| INDIGO *  | Marion Dufresne I  | 1985 | 3     | 13  | A. Poisson            |
| KERFIX *  | La Curieuse        | 1992 | 5     | 1   | A. Poisson/C. Jeandel |
| KERFIX *  | La Curieuse        | 1992 | 7     | 3   | A. Poisson/C. Jeandel |
| KERFIX *  | La Curieuse        | 1992 | 9     | 17  | A. Poisson/C. Jeandel |
| KERFIX *  | La Curieuse        | 1992 | 10    | 16  | A. Poisson/C. Jeandel |
| KERFIX *  | La Curieuse        | 1992 | 11    | 24  | A. Poisson/C. Jeandel |
| KERFIX *  | La Curieuse        | 1992 | 12    | 17  | A. Poisson/C. Jeandel |
| KERFIX *  | La Curieuse        | 1992 | 12    | 17  | A. Poisson/C. Jeandel |
| KERFIX *  | La Curieuse        | 1993 | 1     | 30  | A. Poisson/C. Jeandel |
| KERFIX *  | La Curieuse        | 1993 | 4     | 6   | A. Poisson/C. Jeandel |
| KERFIX *  | La Curieuse        | 1993 | 5     | 15  | A. Poisson/C. Jeandel |
| KERFIX *  | La Curieuse        | 1993 | 6     | 10  | A. Poisson/C. Jeandel |
| KERFIX *  | La Curieuse        | 1993 | 7     | 16  | A. Poisson/C. Jeandel |
| KERFIX *  | La Curieuse        | 1993 | 8     | 17  | A. Poisson/C. Jeandel |
| KERFIX *  | La Curieuse        | 1993 | 9     | 16  | A. Poisson/C. Jeandel |
| KERFIX *  | La Curieuse        | 1993 | 10    | 27  | A. Poisson/C. Jeandel |
| KERFIX *  | La Curieuse        | 1993 | 11    | 28  | A. Poisson/C. Jeandel |
| OISO-01 * | Marion Dufresne II | 1998 | 2     | 3   | N.Metzl               |
| OISO-02 * | Marion Dufresne II | 1998 | 8     | 26  | N.Metzl               |
| OISO-03 * | Marion Dufresne II | 1998 | 12    | 15  | N.Metzl               |
| OISO-03 * | Marion Dufresne II | 1998 | 12    | 15  | N.Metzl               |
| OISO-04 * | Marion Dufresne II | 2000 | 1     | 24  | N.Metzl               |
| OISO-05 * | Marion Dufresne II | 2000 | 7     | 31  | N.Metzl               |
| OISO-06 * | Marion Dufresne II | 2001 | 1     | 13  | N.Metzl               |
| OISO-08 * | Marion Dufresne II | 2002 | 1     | 14  | N.Metzl               |
| OISO-11 * | Marion Dufresne II | 2004 | 2     | 2   | N.Metzl               |
| OISO-12 * | Marion Dufresne II | 2005 | 2     | 10  | N.Metzl               |
| OISO-18 * | Marion Dufresne II | 2010 | 1     | 13  | C.Lo Monaco/N.Metzl   |
| OISO-19 * | Marion Dufresne II | 2011 | 1     | 30  | C.Lo Monaco/N.Metzl   |
| OISO-21   | Marion Dufresne II | 2012 | 2     | 9   | C.Lo Monaco/N.Metzl   |
| OISO-22   | Marion Dufresne II | 2013 | 2     | 24  | C.Lo Monaco/N.Metzl   |
| OISO-24   | Marion Dufresne II | 2015 | 1     | 21  | C.Lo Monaco/N.Metzl   |
| OISO-25   | Marion Dufresne II | 2016 | 1     | 14  | C.Lo Monaco/N.Metzl   |
| OISO-26   | Marion Dufresne II | 2016 | 10    | 18  | C.Lo Monaco/N.Metzl   |
| OISO-27   | Marion Dufresne II | 2017 | 1     | 22  | C.Lo Monaco/N.Metzl   |
| OISO-28   | Marion Dufresne II | 2018 | 1     | 21  | C.Lo Monaco/N.Metzl   |
| OISO-29   | Marion Dufresne II | 2019 | 1     | 26  | C.Lo Monaco/N.Metzl   |
| OISO-30   | Marion Dufresne II | 2020 | 1     | 20  | C.Lo Monaco/N.Metzl   |
| OISO-31   | Marion Dufresne II | 2021 | 2     | 15  | C.Lo Monaco/N.Metzl   |

Table S1b: List of cruises extracted from SOCAT data product version v2022 (Bakker et al, 2022) in the region around 50°S-68°E. For some cruises when there is no measured salinity or when salinity is suspected we used the salinity from World Ocean Atlas (WOA) also available in SOCAT data files (Pfeil et al, 2013; Antonov et al, 2006). PI stands for Principal Investigator.

| Expocode     | Ship               | PI                       | Salinity | Cruises Flag SOCAT |
|--------------|--------------------|--------------------------|----------|--------------------|
| 31AR19620519 | Argo               | Keeling, C. D.           | WOA      | D                  |
| 35MF19910105 | Marion Dufresne I  | Poisson, A.              |          | D                  |
| 35MF19910224 | Marion Dufresne I  | Poisson, A.              |          | D                  |
| 35MF19910413 | Marion Dufresne I  | Poisson, A.              |          | D                  |
| 35MF19910728 | Marion Dufresne I  | Poisson, A.              |          | D                  |
| 35MF19920414 | Marion Dufresne I  | Poisson, A.              | WOA      | D                  |
| 35MF19920725 | Marion Dufresne I  | Poisson, A.              | WOA      | D                  |
| 35MF19930130 | Marion Dufresne I  | Poisson, A.              |          | D                  |
| 74E319930210 | Discovery          | Robertson, J.            |          | D                  |
| 35MF19930319 | Marion Dufresne I  | Poisson, A.              | WOA      | D                  |
| 35MF19930330 | Marion Dufresne I  | Poisson, A.              | WOA      | D                  |
| 35MF19930524 | Marion Dufresne I  | Poisson, A.              |          | D                  |
| 35MF19930625 | Marion Dufresne I  | Poisson, A.              |          | D                  |
| 35MF19940128 | Marion Dufresne I  | Metzl, N.                |          | E                  |
| 35MF19950928 | Marion Dufresne I  | Metzl, N.                | WOA      | D                  |
| 35MF19980121 | Marion Dufresne II | Metzl, N.                |          | D                  |
| 35MF19980819 | Marion Dufresne II | Metzl, N.                |          | D                  |
| 35MF19981204 | Marion Dufresne II | Metzl, N.                |          | D                  |
| 35MF20000115 | Marion Dufresne II | Metzl, N.                |          | D                  |
| 35MF20000721 | Marion Dufresne II | Metzl, N.                |          | D                  |
| 35MF20010104 | Marion Dufresne II | Metzl, N.                |          | D                  |
| 35MF20020105 | Marion Dufresne II | Metzl, N.                |          | D                  |
| 35MF20040106 | Marion Dufresne II | Metzl, N.                |          | D                  |
| 35MF20050113 | Marion Dufresne II | Metzl, N.                |          | D                  |
| 35MF20050919 | Marion Dufresne II | Metzl, N.                |          | D                  |
| 35MF20060105 | Marion Dufresne II | Metzl, N.                |          | D                  |
| 35MF20070104 | Marion Dufresne II | Metzl, N.                |          | D                  |
| 35MF20080105 | Marion Dufresne II | Metzl, N.                |          | D                  |
| 35MF20091224 | Marion Dufresne II | Metzl, N.                |          | D                  |
| 35MF20110115 | Marion Dufresne II | Metzl, N.                |          | D                  |
| 35MF20111011 | Marion Dufresne II | Metzl, N.                |          | D                  |
| 35MF20120125 | Marion Dufresne II | Metzl, N.                |          | D                  |
| 35MF20130210 | Marion Dufresne II | Metzl, N.                |          | D                  |
| 35MF20140109 | Marion Dufresne II | Metzl, N.: Lo Monaco, C. |          | B                  |
| 35MF20150107 | Marion Dufresne II | Metzl, N.: Lo Monaco, C. |          | B                  |
| 35MF20160108 | Marion Dufresne II | Metzl, N.: Lo Monaco, C. |          | B                  |
| 35MV20161006 | Marion Dufresne II | Metzl, N.: Lo Monaco, C. |          | B                  |
| 35MV20170105 | Marion Dufresne II | Metzl, N.: Lo Monaco, C. |          | B                  |
| 35MV20180105 | Marion Dufresne II | Lo Monaco, C.: Metzl, N. |          | B                  |
| 35MV20190109 | Marion Dufresne II | Lo Monaco, C.: Metzl, N. |          | B                  |
| 35MV20200106 | Marion Dufresne II | Lo Monaco, C.: Metzl, N. |          | B                  |
| 35MV20210113 | Marion Dufresne II | Lo Monaco, C.: Metzl, N. |          | B                  |

Table S2: Mean values and standard error (Std) of properties in deep water (> 1450m) observed in 1985-2021 at station OISO-KERFIX (50°40'S-68°25'E). Results for  $C_T$  and  $A_T$  are shown in Figure S1. pH,  $[H^+]$ ,  $[CO_3^{2-}]$ ,  $\Omega_{Ca}$ ,  $\Omega_{Ar}$  and  $C_{ant}$  calculated as described in the manuscript. NB is the number of data selected in the layer. Only data with WOCE/GLODAP flag 2 selected (e.g.  $C_T$  data in 2014 discarded).

|      | $\theta$<br>(°C) | S<br>PSU | $O_2$<br>$\mu M.kg^{-1}$ | $A_T$<br>$\mu M.kg^{-1}$ | $C_T$<br>$\mu M.kg^{-1}$ | pH<br>TS | $[H^+]$<br>nM.kg <sup>-1</sup> | $[CO_3^{2-}]$<br>$\mu M.kg^{-1}$ | $\Omega_{Ca}$ | $\Omega_{Ar}$ | $C_{ant}$<br>$\mu M.kg^{-1}$ |
|------|------------------|----------|--------------------------|--------------------------|--------------------------|----------|--------------------------------|----------------------------------|---------------|---------------|------------------------------|
| Mean | 1.653            | 34.758   | 203.0                    | 2349.2                   | 2240.7                   | 7.910    | 12.3                           | 84.7                             | 1.463         | 0.938         | 6.5                          |
| Std  | 0.075            | 0.004    | 3.6                      | 4.2                      | 3.7                      | 0.012    | 0.4                            | 2.3                              | 0.038         | 0.025         | 5.4                          |
| NB   | 44               | 42       | 42                       | 41                       | 43                       | 40       | 40                             | 40                               | 40            | 40            | 39                           |

Figures S1: Time-series of  $C_T$  and  $A_T$  concentrations observed in deep water (> 1450m) in 1985-2021 at station OISO-KERFIX (50°40'S-68°25'E). The mean values and standard-error for all cruises (Table S2) indicated by dashed-black and dashed-grey lines. Accuracy data is  $\pm 3 \mu mol.kg^{-1}$  (vertical bars).

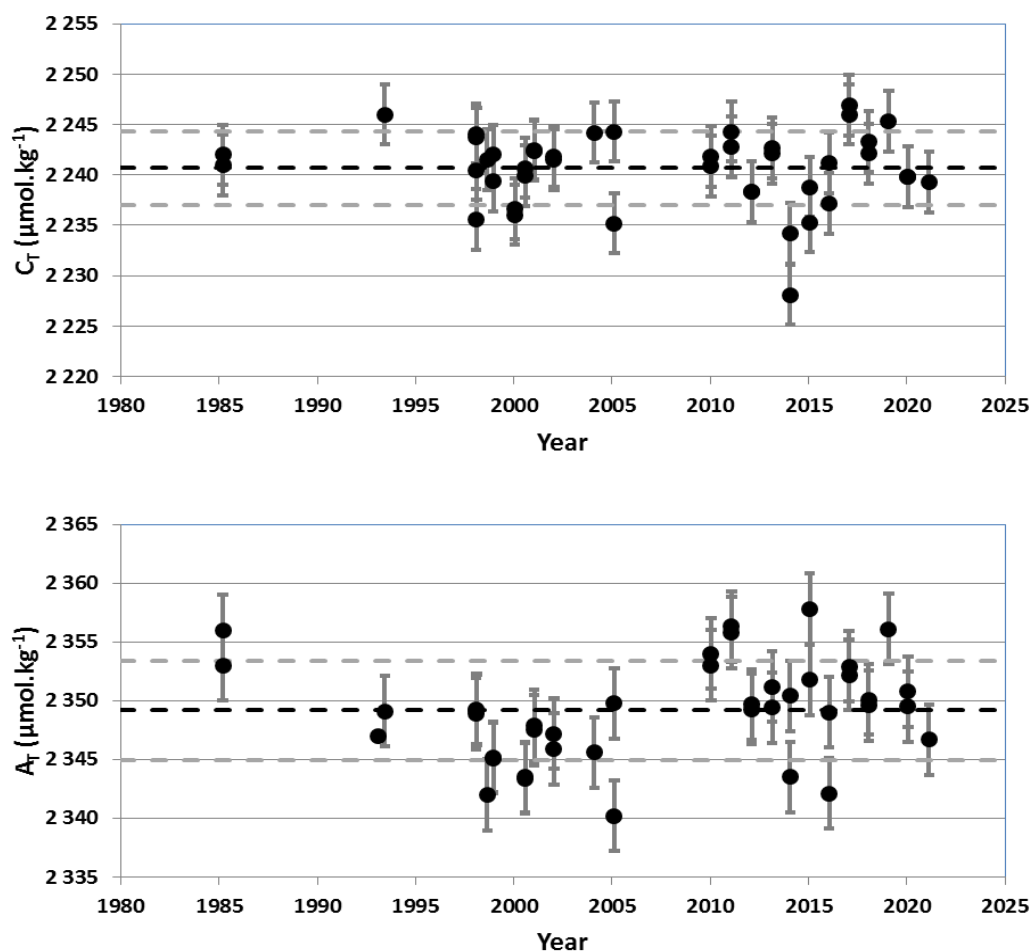

Comparison of measured and calculated properties for different data-sets:

To validate the carbonate properties calculated with different data-sets, we compare the surface properties used for the trend analysis. Table S3 presents the difference between measured underway  $f\text{CO}_2$  data with those derived from the FFNN model for 1991-2020. Table S4 presents the differences between Station data (based on  $A_T$  and  $C_T$  measurements) with properties calculated from the  $f\text{CO}_2$  data or from the FFNN data for all cruises in 1991-2021. Finally, in Table S5 we compare FFNN data for March 1985 with the data at that station for the same period (INDIGO cruise).

-----  
 Table S3: Mean difference (DIFF) and standard-deviation (STD) of properties derived from the surface  $f\text{CO}_2$  data-set and the FFNN model at location 50.5°S-68.5°E. For the period 1991 to 2020 we identified 35 months for this comparison. Figure S2 shows the time-series for observed and modeled  $f\text{CO}_2$  and their differences.  
 -----

|      | SST<br>(°C) | SAL<br>PSU | $A_T$<br>$\mu\text{M.kg}^{-1}$ | $C_T$<br>$\mu\text{M.kg}^{-1}$ | $f\text{CO}_2$<br>$\mu\text{atm}$ | pH<br>TS | $[\text{H}^+]$<br>$\text{nM.kg}^{-1}$ | $[\text{CO}_3^{2-}]$<br>$\mu\text{M.kg}^{-1}$ | $\Omega_{\text{Ca}}$ | $\Omega_{\text{Ar}}$ | Revelle |
|------|-------------|------------|--------------------------------|--------------------------------|-----------------------------------|----------|---------------------------------------|-----------------------------------------------|----------------------|----------------------|---------|
| DIFF | -0.063      | 0.004      | 0.4                            | 1.5                            | 2.1                               | -0.002   | 0.049                                 | -0.7                                          | -0.019               | -0.012               | 0.054   |
| STD  | (0.360)     | (0.068)    | (4.9)                          | (5.0)                          | (7.0)                             | (0.008)  | (0.148)                               | (2.1)                                         | (0.050)              | (0.032)              | (0.145) |

-----  
 Table S4: Mean difference and standard-deviation (STD) of properties derived from the underway surface  $f\text{CO}_2$  data or the FFNN model with observations in the Mixed-Layer. For the period 1993 to 2021 we identified 22 co-located months for this comparison (21 for the FFNN model). Figure S3 shows the results for  $C_T$ .  
 -----

| Data           | SST<br>°C | SAL<br>PSU | $A_T$<br>$\mu\text{M.kg}^{-1}$ | $C_T$<br>$\mu\text{M.kg}^{-1}$ | $f\text{CO}_2$<br>$\mu\text{atm}$ | pH<br>TS | $[\text{H}^+]$<br>$\text{nM.kg}^{-1}$ | $[\text{CO}_3^{2-}]$<br>$\mu\text{M.kg}^{-1}$ | $\Omega_{\text{Ca}}$ | $\Omega_{\text{Ar}}$ | Revelle |
|----------------|-----------|------------|--------------------------------|--------------------------------|-----------------------------------|----------|---------------------------------------|-----------------------------------------------|----------------------|----------------------|---------|
| $f\text{CO}_2$ | -0.010    | -0.009     | -5.1                           | -8.2                           | -8.7                              | 0.008    | -0.160                                | 1.6                                           | 0.036                | 0.023                | -0.141  |
| (STD)          | (0.189)   | (0.062)    | (6.2)                          | (6.5)                          | (10.6)                            | (0.012)  | (0.224)                               | (2.6)                                         | (0.063)              | (0.039)              | (0.177) |
| FFNN           | -0.116    | -0.011     | -4.5                           | -6.2                           | -6.4                              | 0.006    | -0.108                                | 0.7                                           | 0.013                | 0.008                | -0.074  |
| (STD)          | (0.403)   | (0.034)    | (5.0)                          | (7.2)                          | (14.9)                            | (0.016)  | (0.315)                               | (4.2)                                         | (0.099)              | (0.063)              | (0.291) |

Figure S2: (a): Time-series of  $f\text{CO}_2$  ( $\mu\text{atm}$ ) data from observations in 1991-2021 (grey circles) near station OISO-KERFIX ( $50^\circ 40'S$ - $68^\circ 25'E$ ) and from the FFNN model (black diamonds) for the same months and location. (b): Time-series of the differences between observed  $f\text{CO}_2$  and the FFNN model. The mean differences and associated standard-deviations for all cruises (Table S3) are indicated respectively by dashed-black and dashed-grey lines. In both figures the vertical bars are the standard deviations of observed  $f\text{CO}_2$  in the box  $50^\circ\text{S}$ - $51.5^\circ\text{S}/67.5$ - $69^\circ\text{E}$  (see Figure 1, Yellow Square). As opposed to the  $f\text{CO}_2$  data (top, figure S2a) there is no trend in the calculated differences (bottom, figure S2b). The same is observed for all properties listed in Table S3.

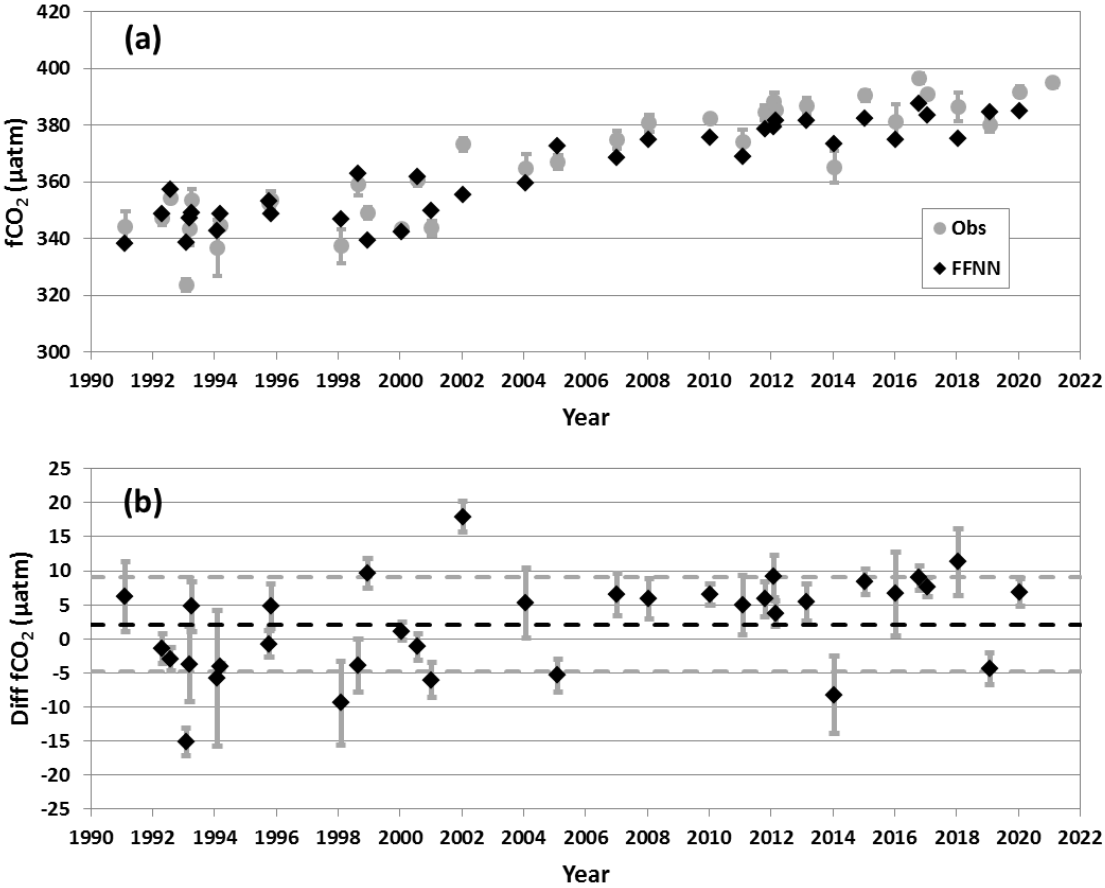

Figure S3: (a): Time-series of  $C_T$  ( $\mu\text{mol.kg}^{-1}$ ) data from observations in 1991-2021 (CT-STAT, orange triangles) at station OISO-KERFIX ( $50^{\circ}40'S-68^{\circ}25'E$ ) and  $C_T$  calculated from the surface  $f\text{CO}_2$  dataset (grey circle) or from the FFNN model (black diamond) for the same months. Vertical bars are the standard deviation of  $C_T$  measurements or as observed in the box  $50^{\circ}S-51.5^{\circ}S/67.5-69^{\circ}E$  (see Figure 1). (b): Time-series of the differences between observed  $C_T$  in the mixed-layer and calculated  $C_T$  from the surface  $f\text{CO}_2$  dataset or the FFNN model. There is no trend in the calculated differences (bottom figure) and the same is observed for all properties listed in Table S4 (not shown).

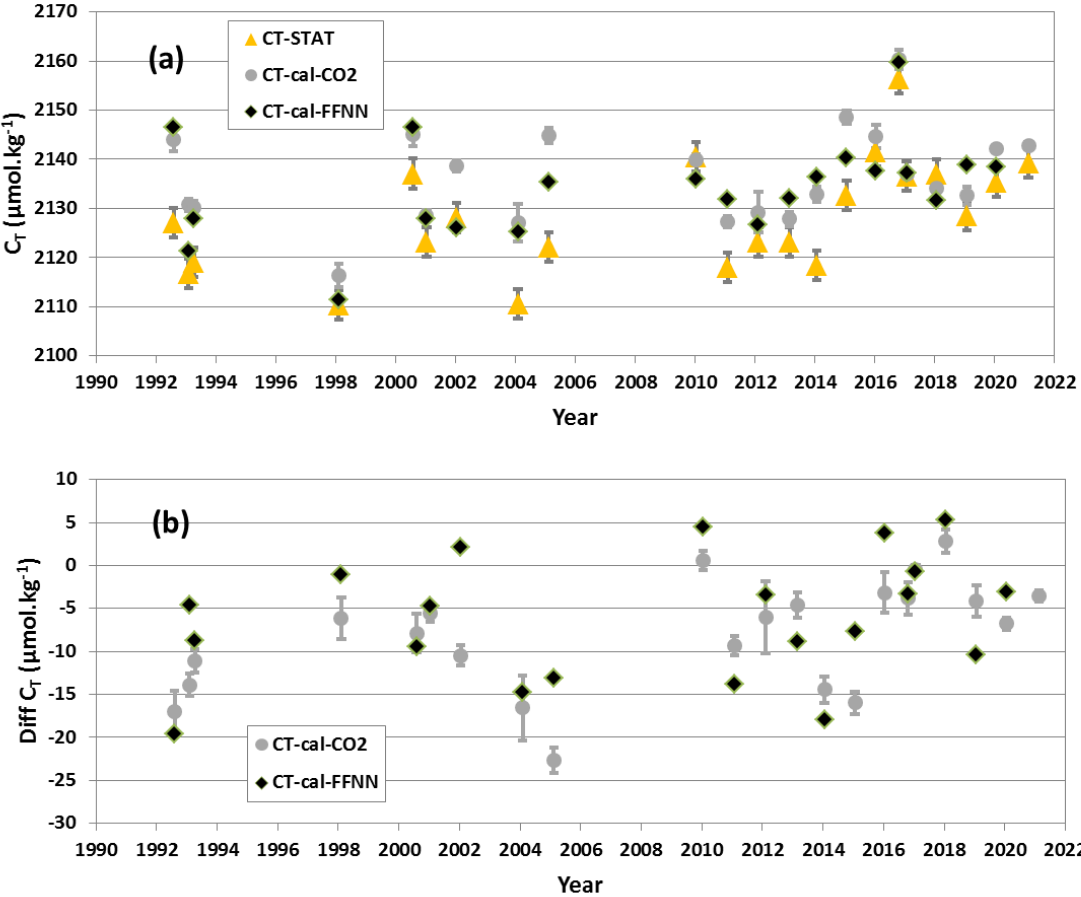

Table S5: Mean properties measured (Temperature, salinity,  $A_T$  and  $C_T$ ) or calculated in March 1985 at Station INDIGO-16 (50.5°S/67.27°E) in the mixed-layer (3 samples in the layer 0-75m) and the same properties based on the FFNN model at the surface for the same period (March 1985). Standard deviations of data are in bracket and differences (FFNN-Data) also listed. Figure S4 shows the seasonal cycle of the SST,  $C_T$ ,  $fCO_2$  and pH for 1985.

|                  | TEMP<br>°C       | SAL<br>PSU        | $A_T$<br>$\mu M.kg^{-1}$ | $C_T$<br>$\mu M.kg^{-1}$ | $fCO_2$<br>$\mu atm$ | pH<br>TS         | $[H^+]$<br>$nM.kg^{-1}$ | $\Omega_{Ca}$    | $\Omega_{Ar}$    |
|------------------|------------------|-------------------|--------------------------|--------------------------|----------------------|------------------|-------------------------|------------------|------------------|
| INDIGO<br>Cruise | 4.734<br>(0.002) | 33.873<br>(0.017) | 2286.7<br>(1.5)          | 2119.3<br>(1.2)          | 336.8<br>(1.0)       | 8.101<br>(0.002) | 7.916<br>(0.039)        | 2.883<br>(0.021) | 1.817<br>(0.013) |
| FFNN<br>Model    | 4.906            | 33.802            | 2281.5                   | 2115.2                   | 339.5                | 8.100            | 7.936                   | 2.907            | 1.831            |
| Difference       | 0.172            | -0.071            | -5.1                     | -4.1                     | 2.7                  | -0.001           | 0.020                   | 0.024            | 0.014            |

Figure S4: Seasonal cycle of sea surface temperature,  $C_T$ ,  $fCO_2$  and pH from the FFNN model in 1985 (black or grey diamonds) and observations from INDIGO-16 station (50.5°S/67.27°E) in March 1985 (black and grey triangles). The atmospheric  $fCO_2$  in 1985 is also shown (red-dashed line) indicating the region was a  $CO_2$  source in March to October. This validates the analysis of the trends based on FFNN model starting in 1985.

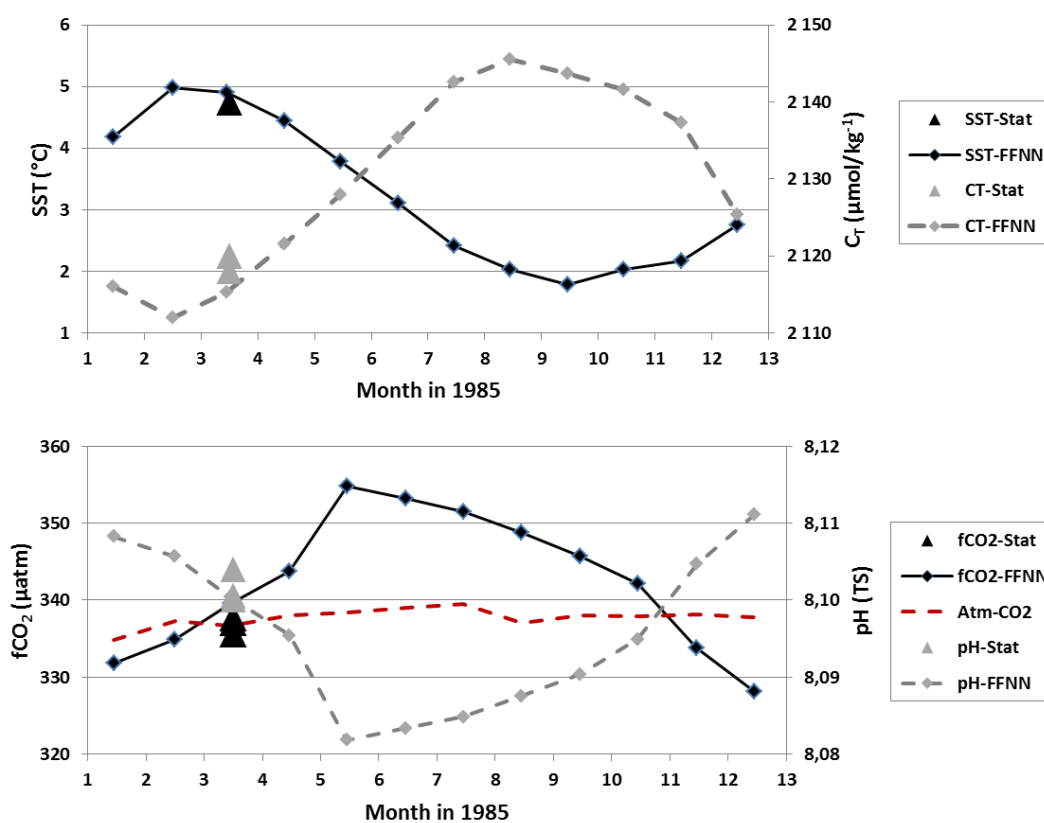



Figure S5: Time-series of  $A_T$  and  $C_T$  ( $\mu\text{mol.kg}^{-1}$ ) measured in 1992-2021 in January-February (red) and October (black) in the mixed-layer (0-30m) at station OISO-KERFIX ( $50^{\circ}40'S-68^{\circ}25'E$ ).

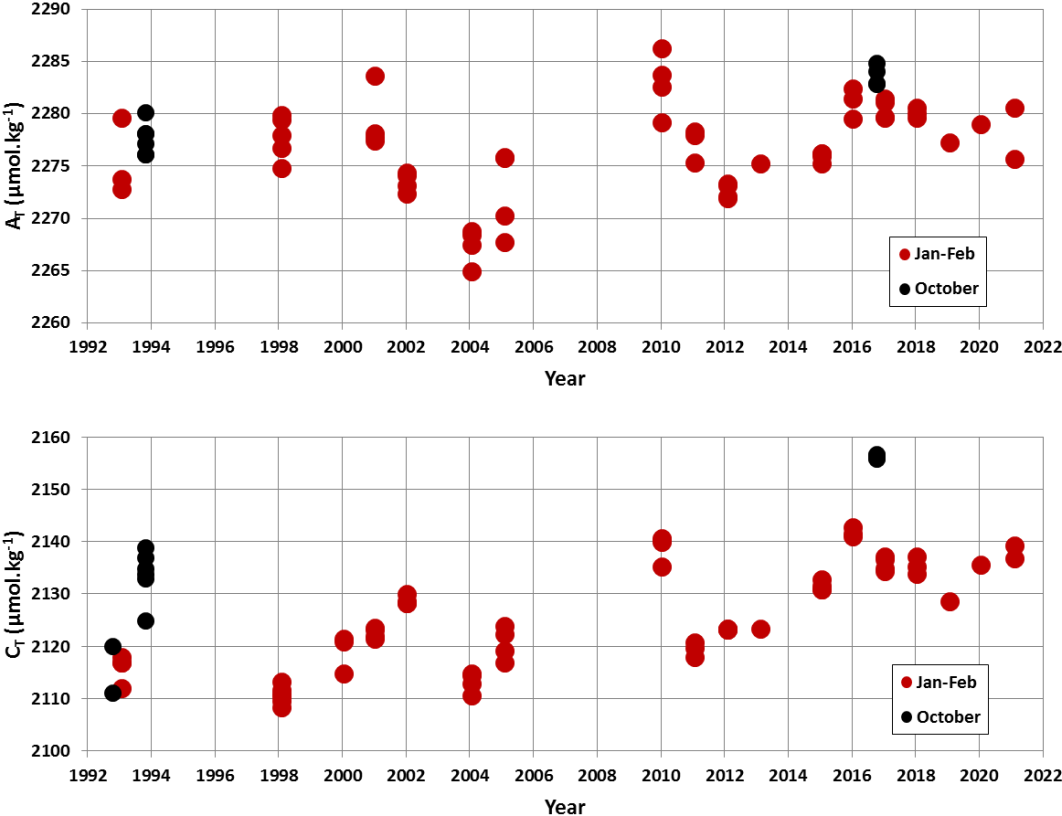

Figure S6: (a): Time-series of Silicate concentrations (SIL,  $\mu\text{mol.kg}^{-1}$ ) measured in January-February 1998-2021 in the mixed-layer (0-30m) at station OISO-10 ( $50^{\circ}40'S-68^{\circ}25'E$ ). (b): Hovmoller section of Silicate in the layer 0-150m in January-February 1998-2021. Silicate concentrations were particularly low in 1998, 2014 and 2016 (down to 100m) and high in 2002 and 2020. Section produced with ODV (Schlitzer, Reiner, Ocean Data View, odv.awi.de, 2018).

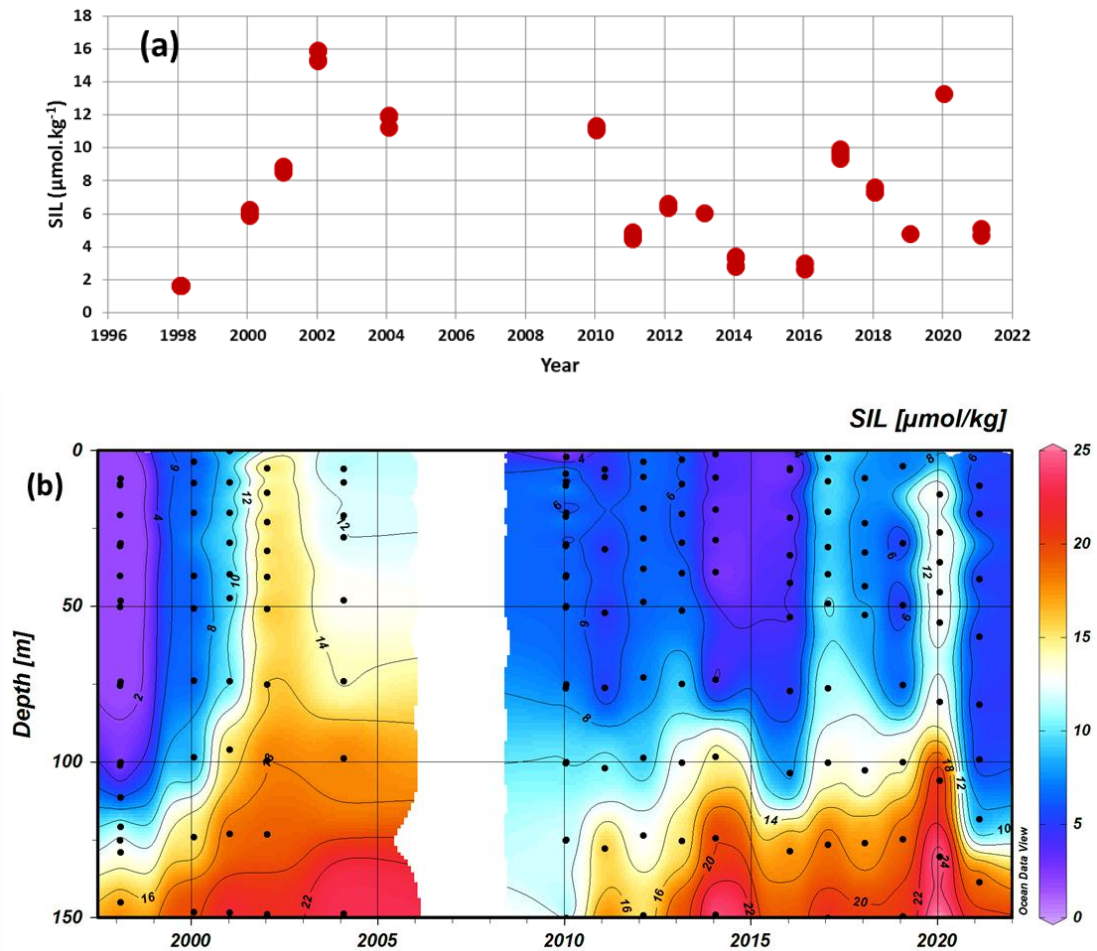

Figure S7: (a): Time-series (1998-2021) of sea surface Chl-a ( $\text{mg}\cdot\text{m}^{-3}$ ) from weekly satellite data (SeaWiFS and MODIS, triangles) and from in-situ data in the layer 0-20m at station OISO-10 (circles, red for January, blue for August and black for October). Due to cloud cover there is no satellite data during austral winter. (b): same Chl-a time-series for the period 2012-2016 highlighting the Chl-a cycle in austral summer 2014 and 2016 that explains the low  $f\text{CO}_2$  compared to 2013 or 2015 (see Figure 2 and S8).

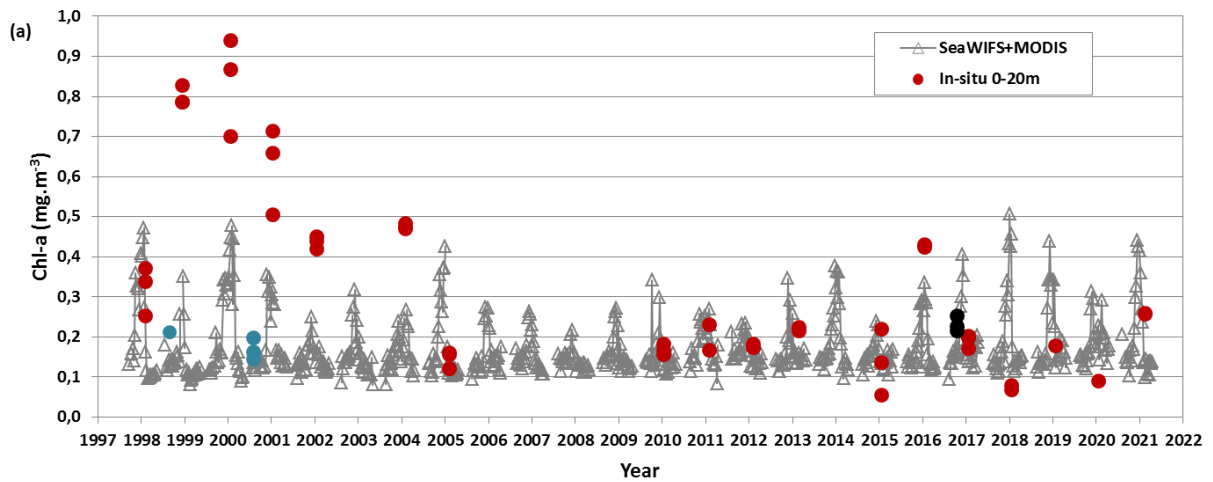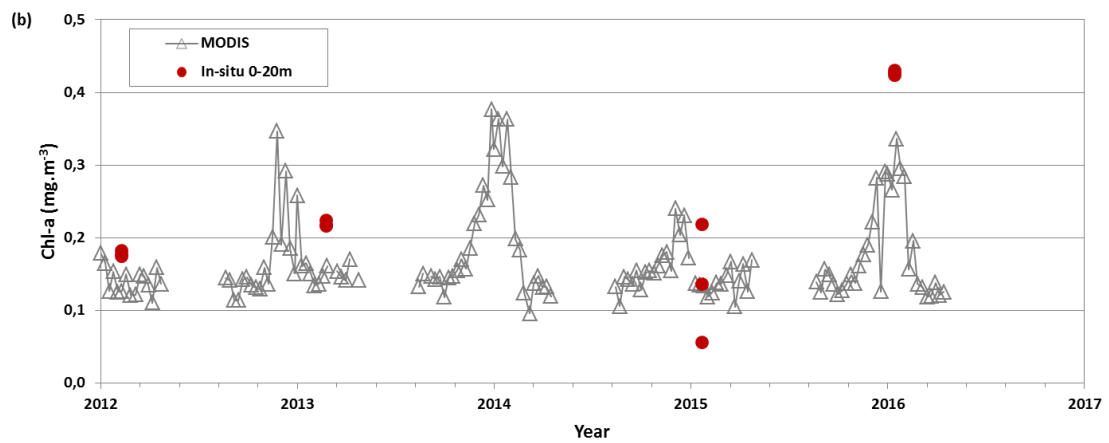

Figure S8: Mean oceanic fCO<sub>2</sub> (µatm) observed over 2010-2020 in January-February (grey circle) and from the FFNN model in January (purple diamonds) close to station OISO-10 (50°40'S-68°25'E). Atmospheric fCO<sub>2</sub> is also shown (red line). In summer both observed and modeled oceanic fCO<sub>2</sub> trends of less than +1 µatm.yr<sup>-1</sup> are much lower than the atmospheric fCO<sub>2</sub> rate of +2.37 µatm.yr<sup>-1</sup> for this period. The low oceanic fCO<sub>2</sub> trend in summer is likely linked to an increase in primary production as suggested from the Chl-a records (Figure 5).

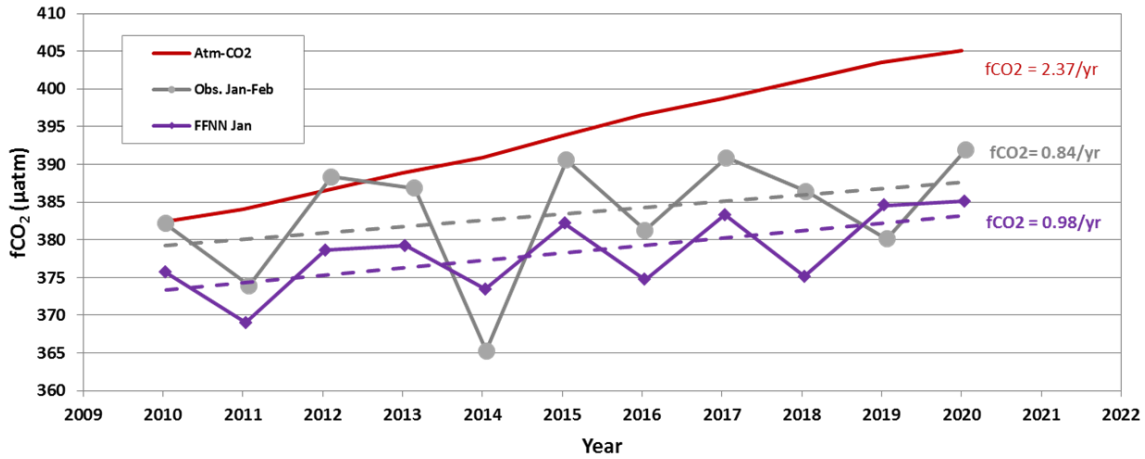

Figure S9: (a): Time-series (1991-2021) of sea surface temperature (SST in °C) from monthly data (grey symbols, Reynolds et al, 2002) and observed in-situ in January-February (red circles) at location 50.5°S-67.5°E. The 12 months running mean (black line) highlights the inter-annual variability and the progressive cooling over 2018-2021. (b): Detail of SST over 2018-2021. The dashed lines identify the trends from the monthly SST ( $-0.474 \pm 0.164 \text{ } ^\circ\text{C.yr}^{-1}$ ) or from observed SST in summer ( $-0.253 \pm 0.092 \text{ } ^\circ\text{C.yr}^{-1}$ ).

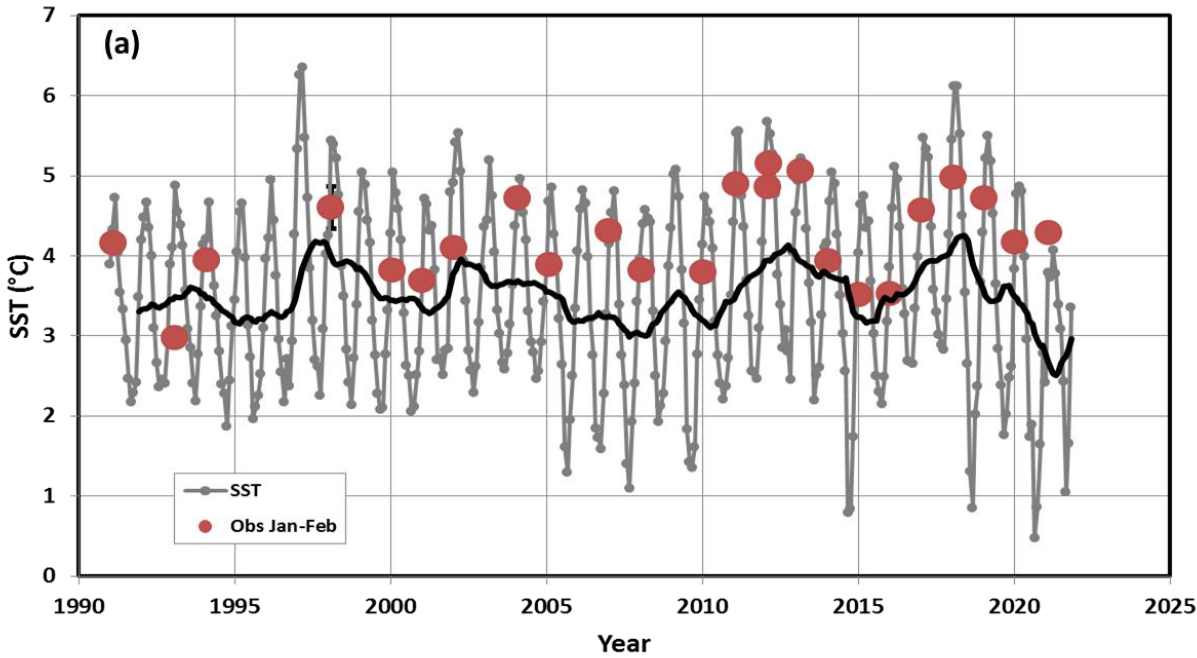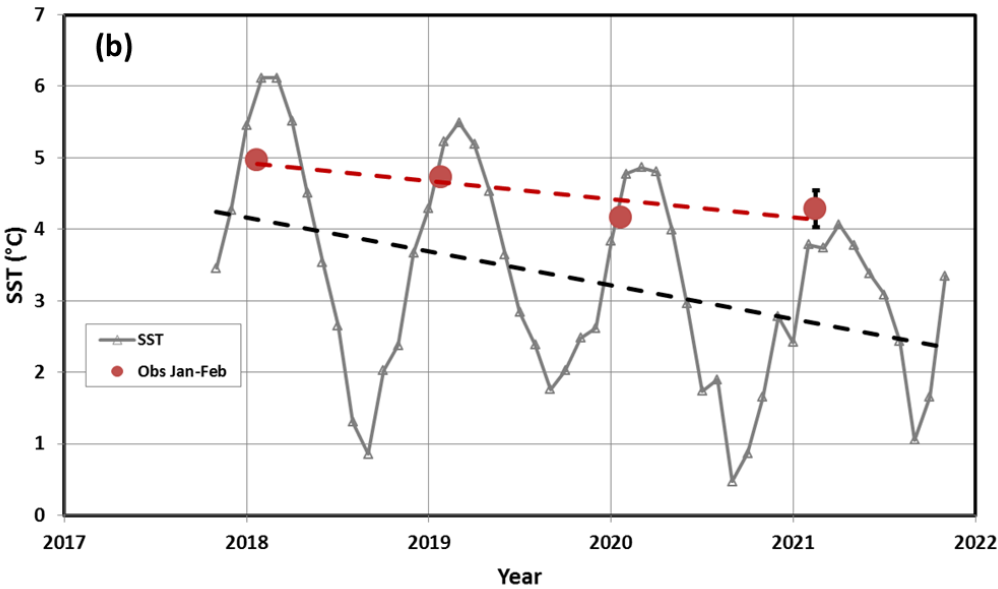

Figure S10: Hovmoller sections of  $C_T$  and  $O_2$  ( $\mu\text{mol}\cdot\text{kg}^{-1}$ ) at station OISO-KERFIX ( $50^\circ 40'S$ - $68^\circ 25'E$ ) over 1985-2021. The  $O_2$  minimum ( $< 180 \mu\text{mol}\cdot\text{kg}^{-1}$ ) is observed in the layer 600-800m. Sections produced with ODV (Schlitzer, Reiner, Ocean Data View, odv.awi.de, 2018).

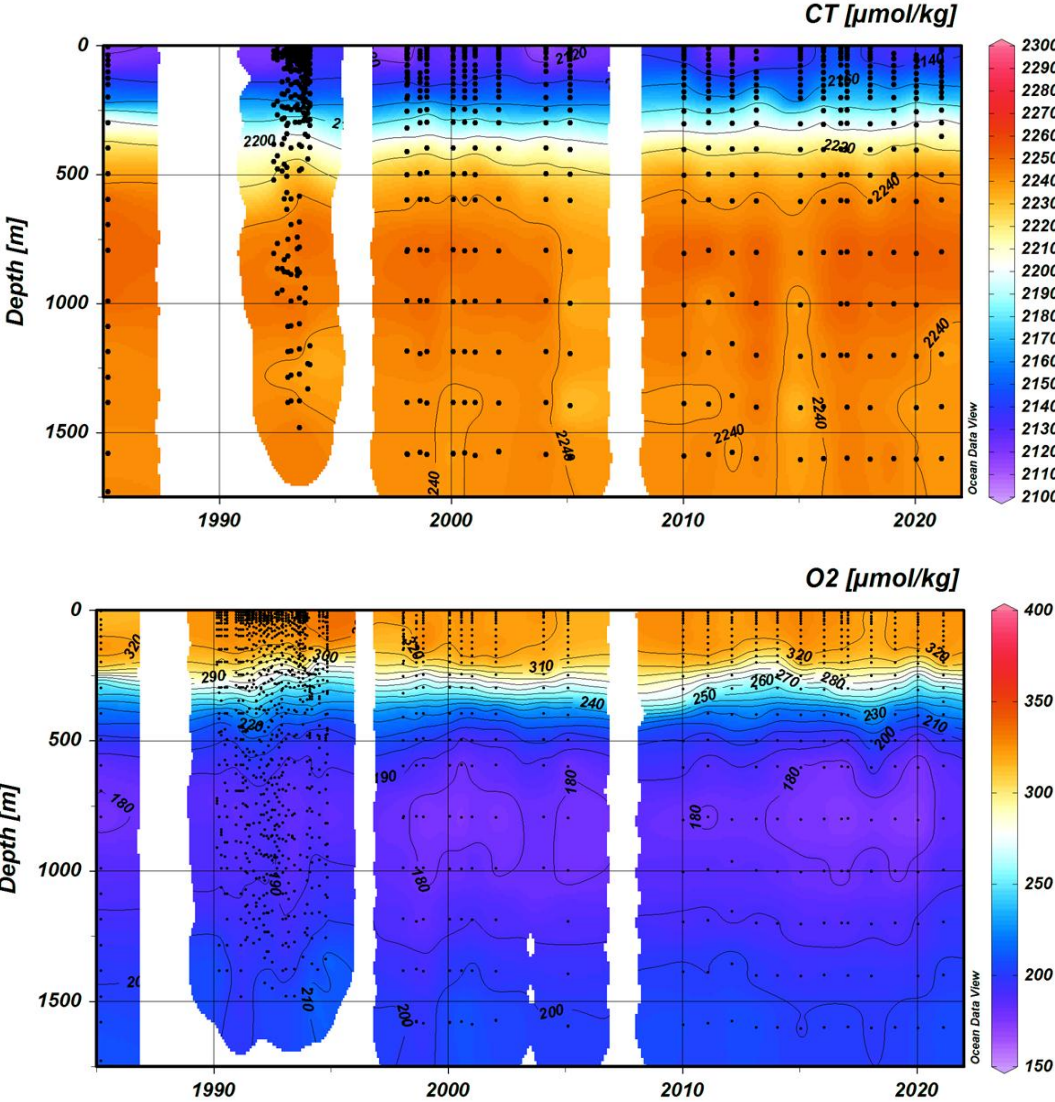

Figure S11: Comparisons of  $C_{ant}$  concentrations ( $\mu\text{mol.kg}^{-1}$ ) and potential temperature ( $^{\circ}\text{C}$ ) profiles in austral winter 1998, 2000 and 2016 (black symbols) and the following summer (red symbols) at station OISO-10 ( $50^{\circ}40'S-68^{\circ}25'E$ ). In the WW layer (temperature minimum around 200m) the  $C_{ant}$  in summer is almost equal to the  $C_{ant}$  evaluated in the mixed-layer during winter. For summer the  $C_{ant}$  values in surface layer 0-150m are not shown (the method is not applicable in the productive zone).

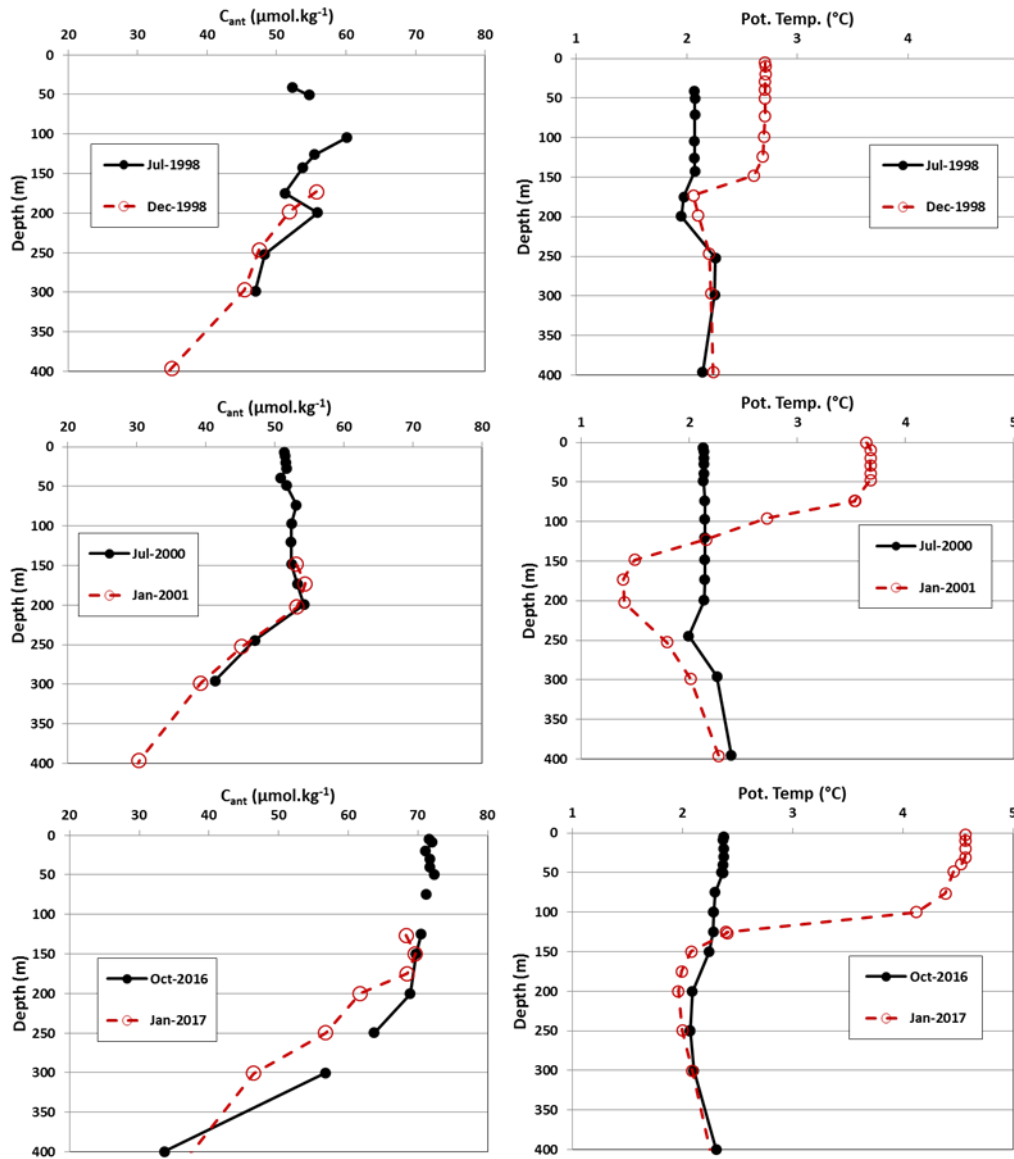



Figure S12: (a): Time-series and trends of sea surface  $C_T$  ( $\mu\text{mol.kg}^{-1}.\text{yr}^{-1}$ ) for different season based on observations (for January, red circles) and the FFNN model (for January or August) around station at  $50^{\circ}40'S-68^{\circ}25'E$  over 1985-2021. The trends for  $C_T$  are indicated for January ( $+0.68 \pm 0.05 \mu\text{mol.kg}^{-1}.\text{yr}^{-1}$  red dashed) and August ( $+0.55 \pm 0.04 \mu\text{mol.kg}^{-1}.\text{yr}^{-1}$  blue dashed). The time-series of  $C_{\text{ant}}$  ( $\mu\text{mol.kg}^{-1}.\text{yr}^{-1}$ ) in the WW is also shown (black circles, right axis). (b) Time-series of the difference (August-January) of sea surface  $C_T$  ( $\mu\text{mol.kg}^{-1}.\text{yr}^{-1}$ ) from the FFNN model (black) and when adding  $C_{\text{ant}}$  since 1985 (red). (c): Time-series and trends of sea surface  $C_T$  ( $\mu\text{mol.kg}^{-1}.\text{yr}^{-1}$ ) from the FFNN model in January for the periods 1985-2001, 2001-2010 and 2010-2020. (d): Time-series of sea surface  $C_T$  ( $\mu\text{mol.kg}^{-1}$ ) in January (red) or August (blue) from the FFNN model over 2010-2020 compared to  $C_T$  (dashed) due only to the  $C_{\text{ant}}$  accumulation after 2010. In August the increase of  $C_T$  is mainly explained by  $C_{\text{ant}}$ . In summer  $C_T$  is lower compared to the  $C_T$  due to  $C_{\text{ant}}$ .

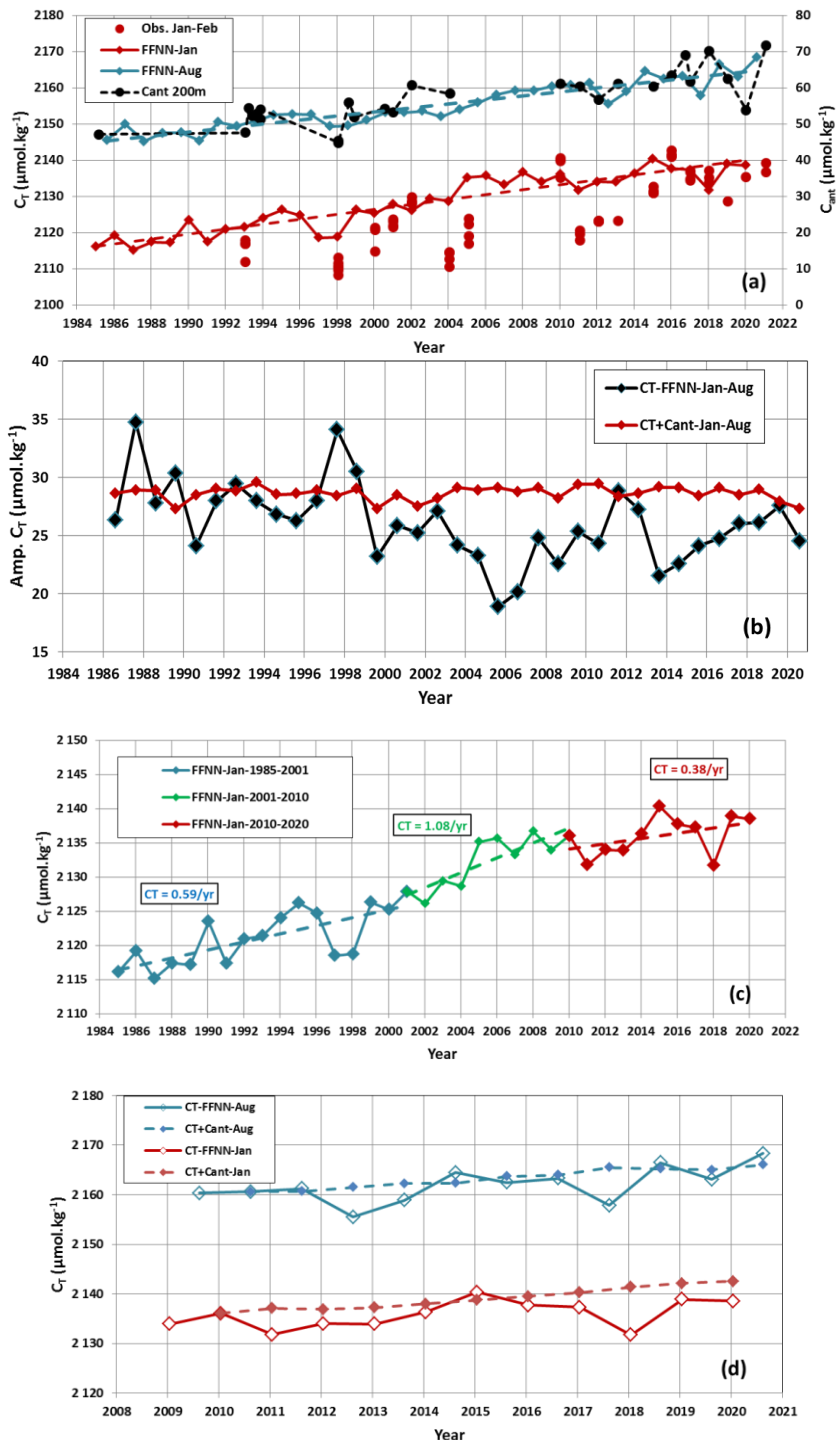



Figure S13: (a): Time-series of  $[H^+]$  surface concentrations ( $\text{nmol.kg}^{-1}$ ) around station OISO-KERFIX at  $50^{\circ}40'S-68^{\circ}25'E$  calculated from  $fCO_2$  data (Figure 2) using the  $A_T/S$  relation (see text). The color dots correspond to 5 periods of the year (January-February, March-April, July-August, October and December) and triangles show the average for each month. The monthly sea surface  $[H^+]$  from the FFNN model is presented for the period 1985-2020 (grey line). The annual  $[H^+]$  trend over 1985-2020 of  $+0.0324 \text{ nmol.kg}^{-1}.\text{yr}^{-1}$  ( $\pm 0.0007$ ) (dashed black) is derived from the FFNN monthly data. (b): Trends of  $[H^+]$  ( $\text{nmol.kg}^{-1}.\text{yr}^{-1}$ ) for different seasons and periods based on observations (January) and the FFNN model (January or August). (c): Profiles (0-400m left axis) of  $[H^+]$  at station OISO-KERFIX in March 1985, January 2020 and January 2021 along with surface time-series over 1985-2020 (right axis) in January (yellow line) and August (blue line) from the FFNN model.

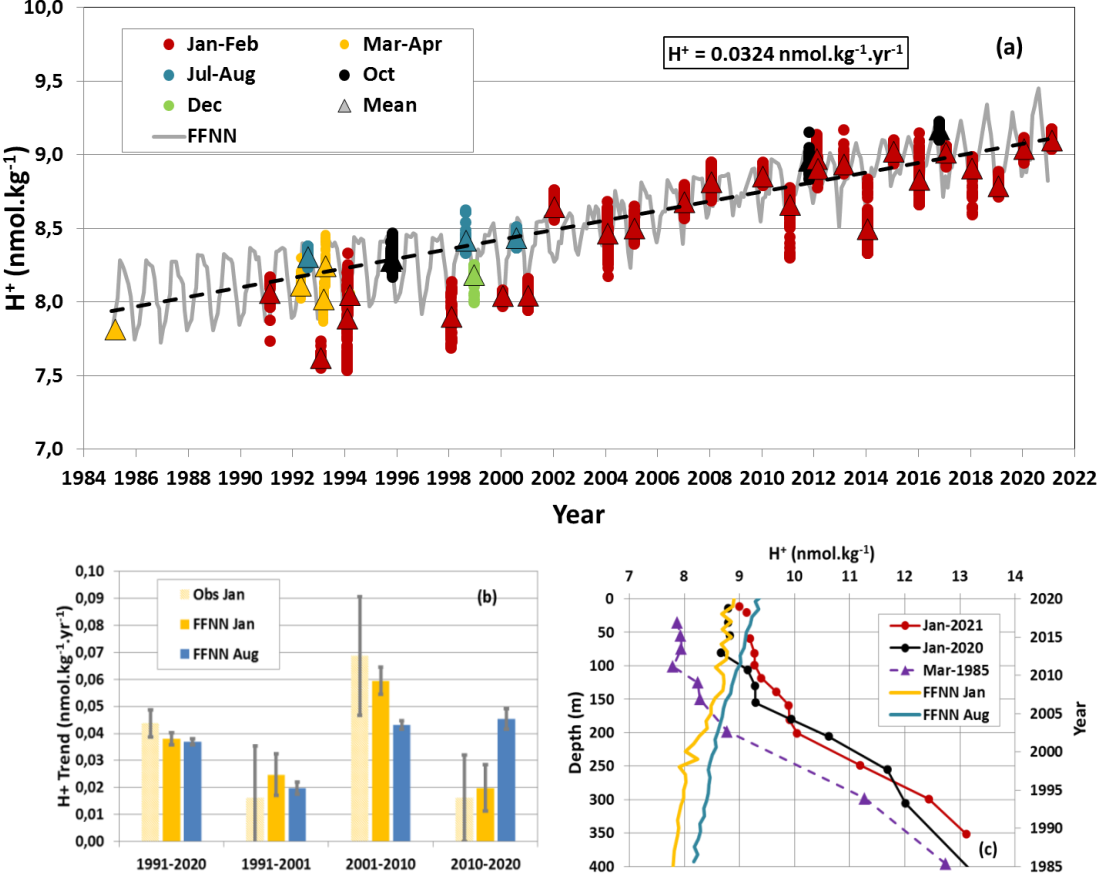

Figure S14: Hovmoller section (Depth-Time) of pH,  $[CO_3^{2-}]$  concentrations ( $\mu\text{mol.kg}^{-1}$ ) and  $\Omega_{Ar}$  over 1985-2021 at station OISO-KERFIX (50°40'S-68°25'E). The sections are presented in the layer 0-800m. The  $[CO_3^{2-}]$  minimum is around 600m. Sections produced with ODV (Schlitzer, Reiner, Ocean Data View, odv.awi.de, 2018).

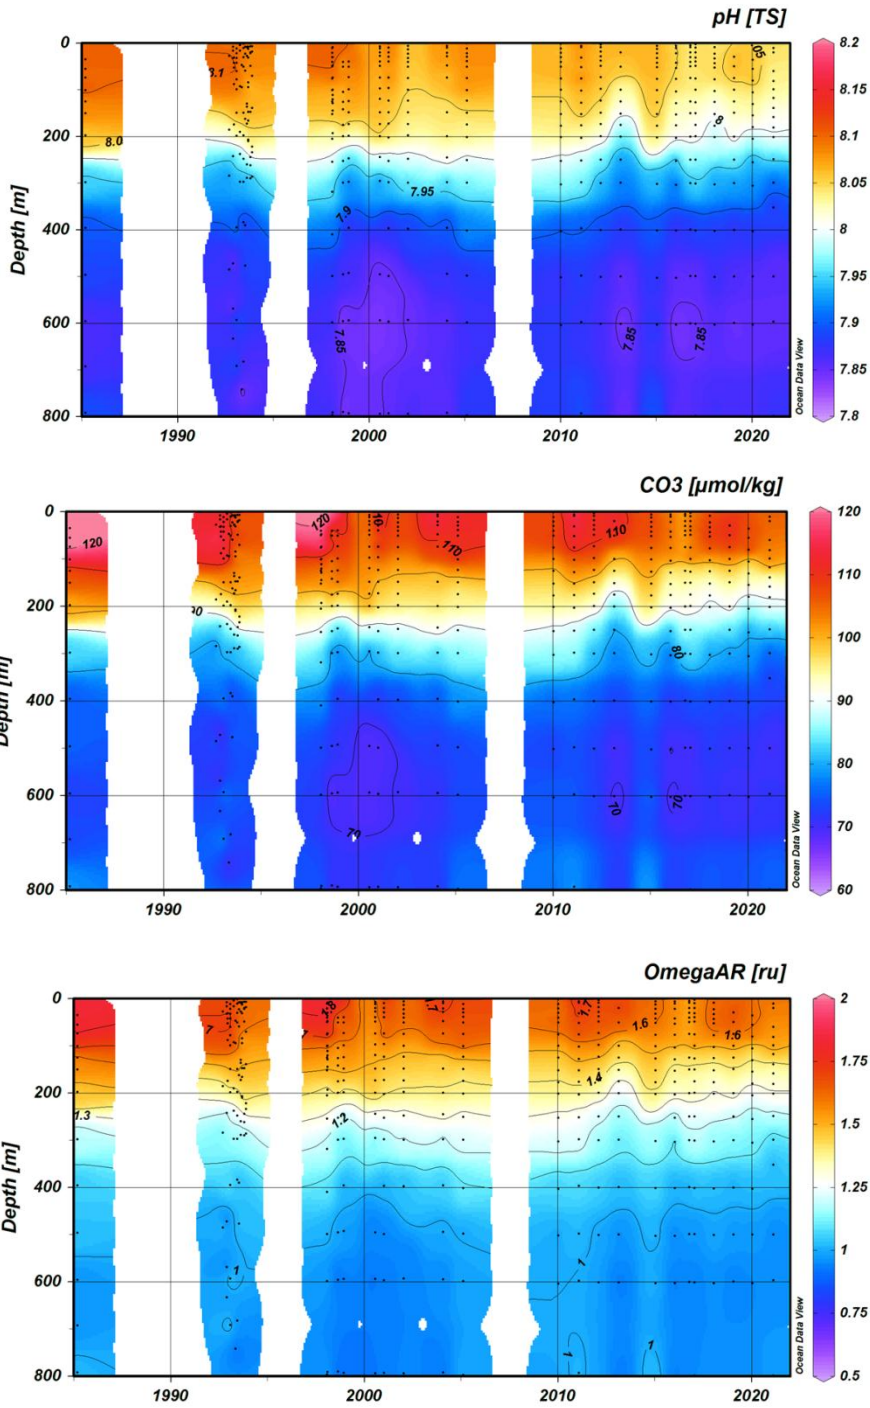

Figure S15: Profiles of  $C_{\text{ant}}$ ,  $[\text{CO}_3^{2-}]$ ,  $\Omega_{\text{Ar}}$  and  $\Omega_{\text{Ca}}$  for present days and pre-industrial (PI) periods based on March 1985 data (black symbols) and February 2021 data (red symbols) at station OISO-KERFIX (50°40'S-68°25'E). Pre-industrial values are calculated when  $C_{\text{ant}}$  is subtracted to  $C_T$  for each sample (PI profiles are shown below 150m only,  $C_{\text{ant}}$  not available in surface layer). The  $[\text{CO}_3^{2-}]$  minimum lies around 600m and decreased by 10  $\mu\text{mol.kg}^{-1}$  from pre-industrial to present days.  $\Omega_{\text{Ar}}$  at 1 is found at the bottom (1600m) for pre-industrial, below 600m in 1985 and below 400m in 2021. Note that the pre-industrial  $[\text{CO}_3^{2-}]$  and  $\Omega$  profiles are very similar either using 1985 or 2021 data.

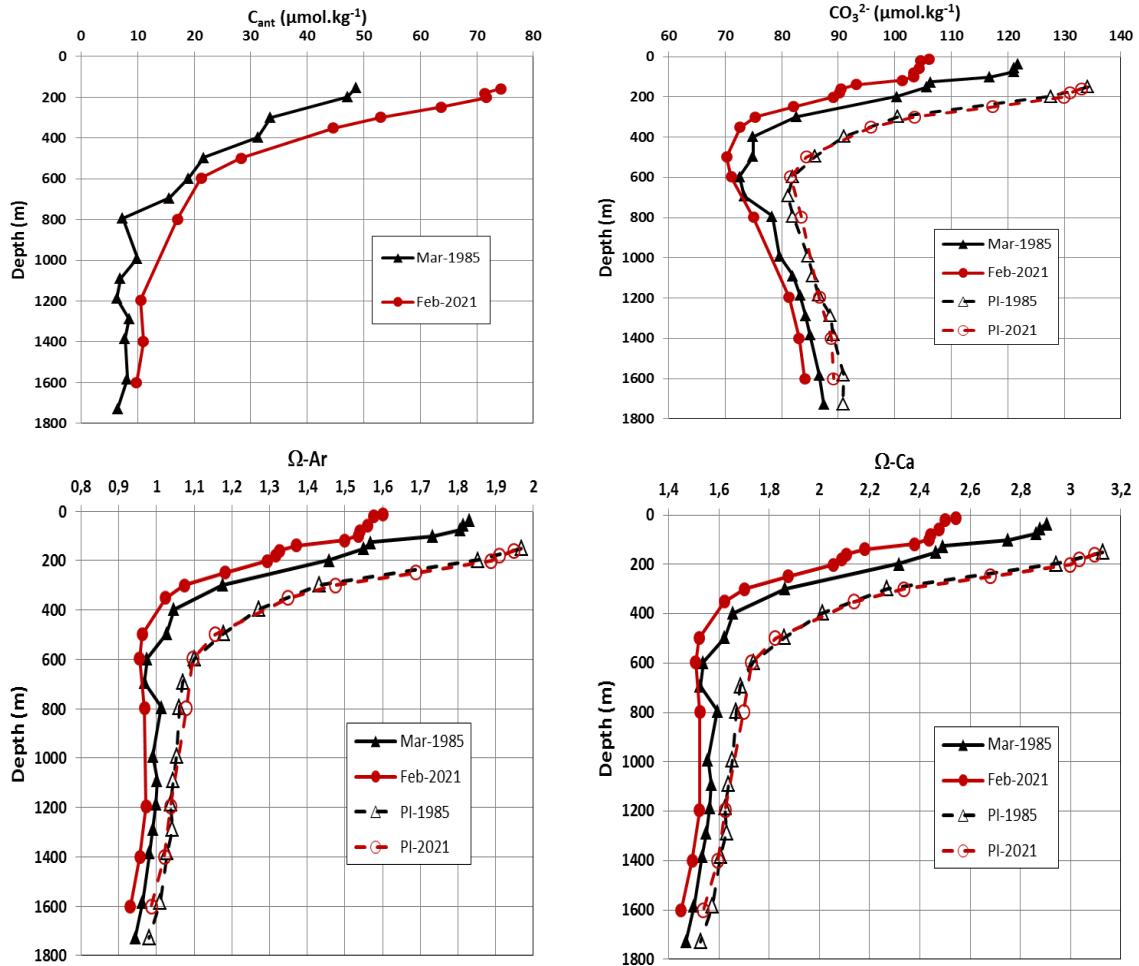

Figure S16: Comparisons of  $\Omega_{Ar}$  profiles in austral winter 1998, 2000 and 2016 (black symbols) and the following summer (red symbols) at station OISO-10 (50°40'S-68°25'E). Below 200m (Winter Water, WW) there is no change of  $\Omega_{Ar}$  from one season to the next. For these periods the undersaturation ( $\Omega_{Ar} < 1$ ) is always below 400m.

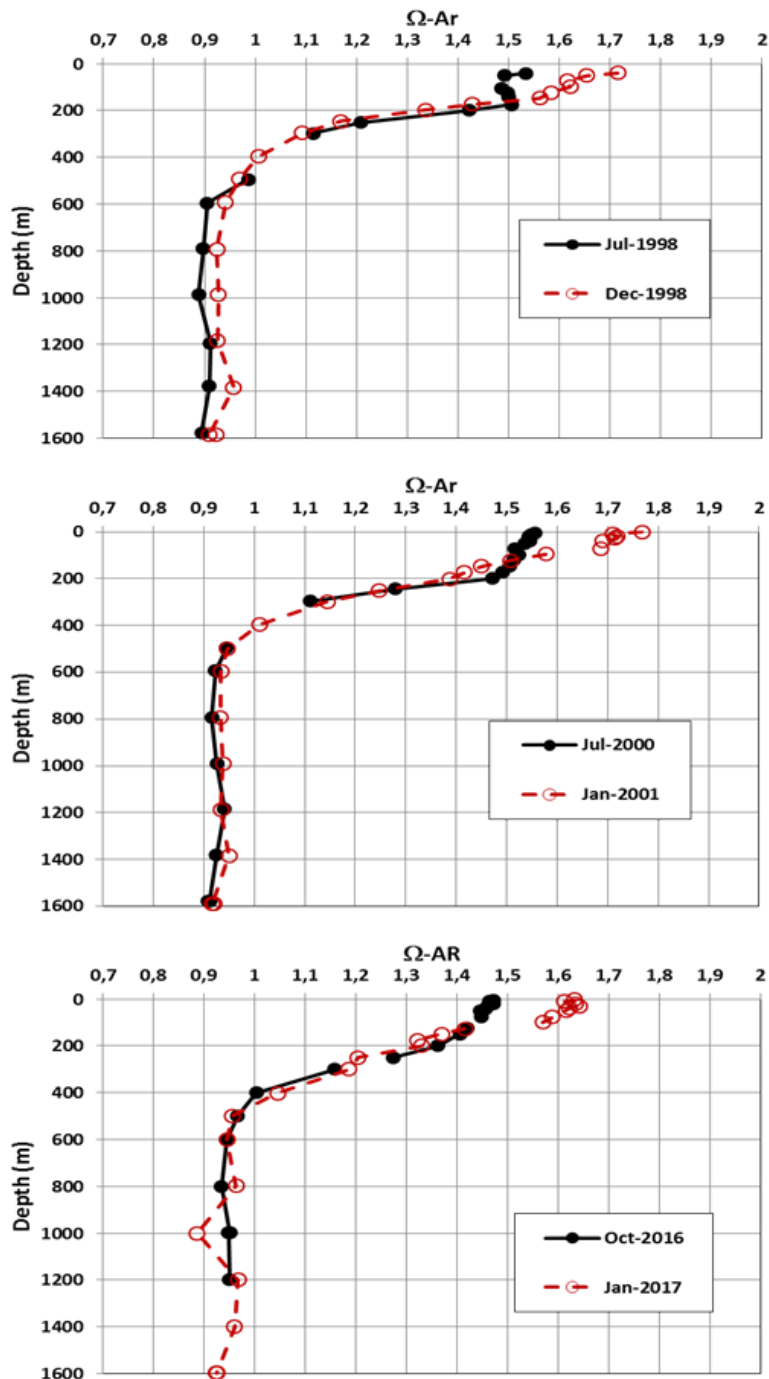

Figure S17: Evolution of pH,  $[H^+]$  (nmol.kg<sup>-1</sup>) and  $\Omega_{Ar}$  in austral winter (blue) and summer (red) around station OISO-KERFIX (50°40'S-68°25'E) from the FFNN model. Here the trends for 1985-2020 are extrapolated in time. The saturation ( $\Omega_{Ar}=1$ ) would be reached at year 2110 in winter and 2120 in summer.

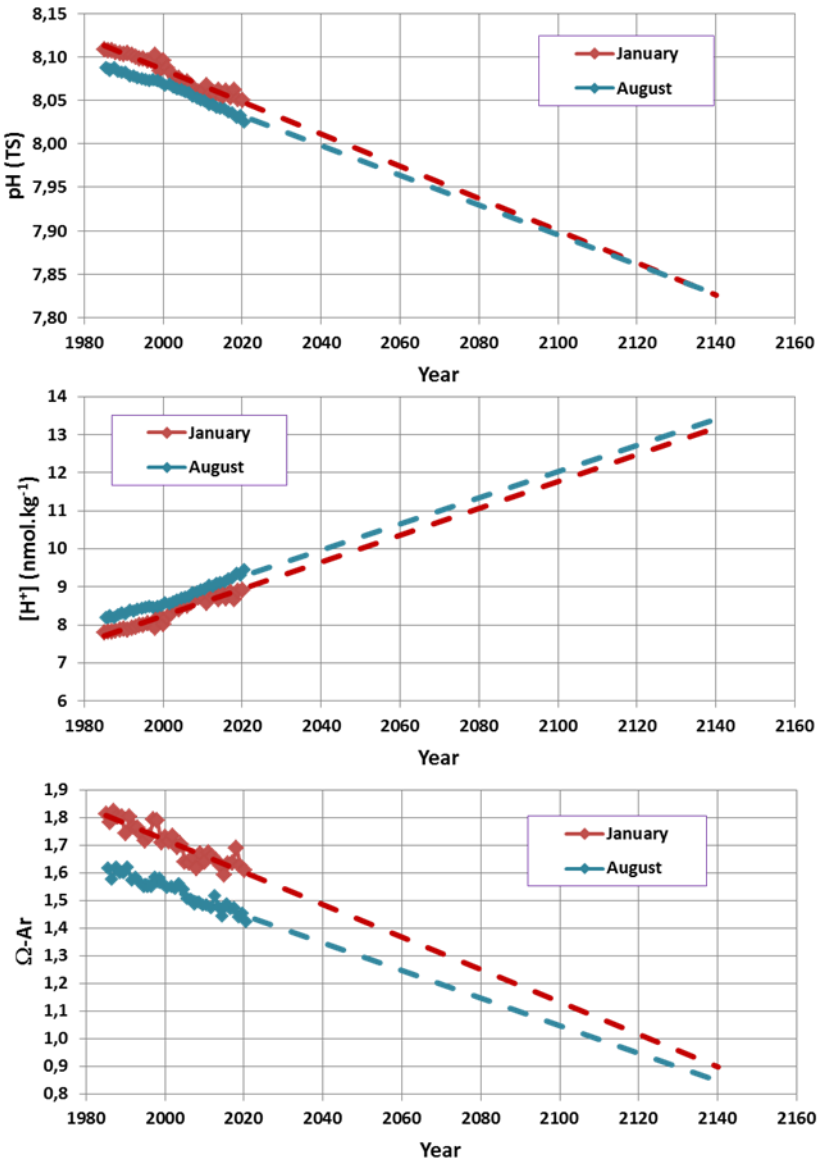

Figure S18: Evolution of sea surface  $f\text{CO}_2$  ( $\mu\text{atm}$ ), pH (TS),  $[\text{CO}_3^{2-}]$  ( $\mu\text{mol.kg}^{-1}$ ),  $[\text{H}^+]$  ( $\text{nmol.kg}^{-1}$ ),  $\Omega_{\text{Ar}}$  and  $\Omega_{\text{Ca}}$  in 1960-2110 evaluated for SSP5-8.5 scenarios for winter (blue line) taking into account both  $A_T$  and SST trends (same as Figure 15 in the main text). Here, results are also presented for the low and high  $C_T$  range (grey lines) based on error associated to the  $C_{\text{ant}}$  reconstruction.

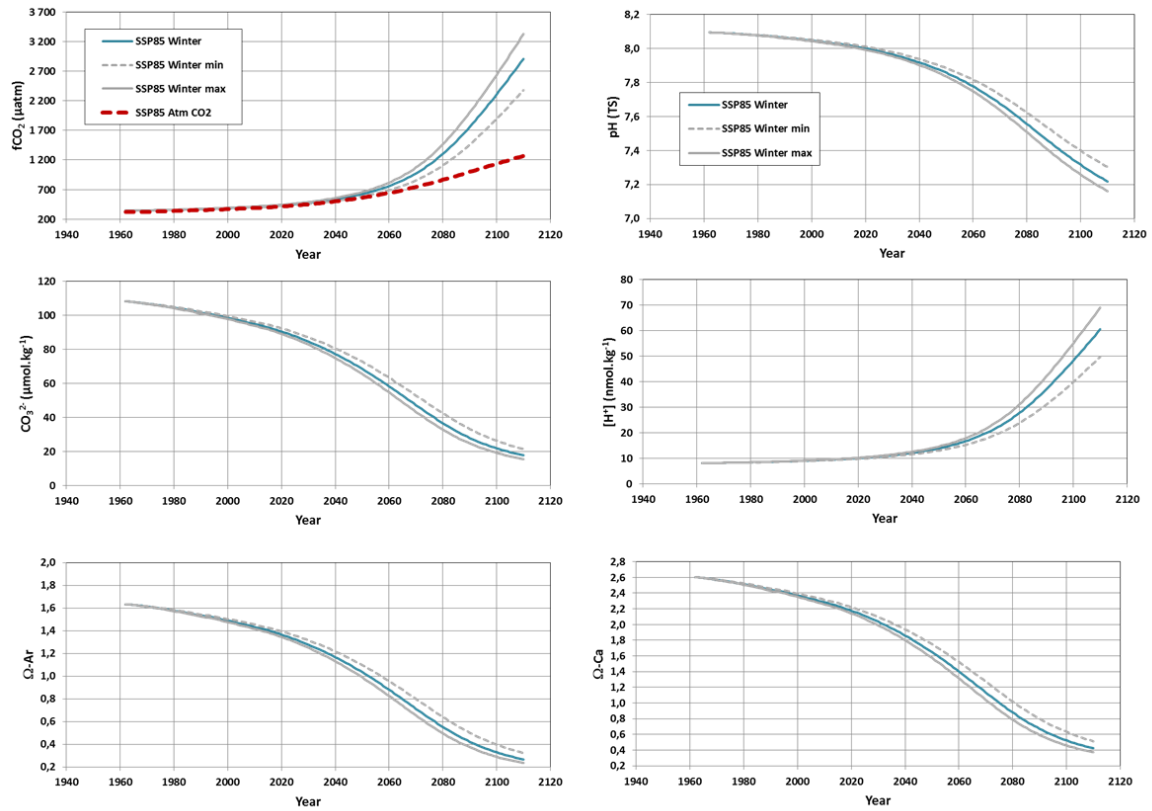

## References in the Supplementary material.

Antonov, J. I., Locarnini, R. A., Boyer, T. P., Mishonov, A. V., and Garcia, H. E.: World Ocean Atlas 2005, in: Volume 2: Salinity, edited by: Levitus, S., NOAA Atlas NESDIS 62, US Government Printing Office, Washington, DC, 182 pp., <https://repository.library.noaa.gov/view/noaa/1127>, 2006.

Bakker, D. C. E. et al: Surface Ocean CO<sub>2</sub> Atlas Database Version 2022 (SOCATv2022) (NCEI Accession 0253659). NOAA National Centers for Environmental Information. Dataset. <https://doi.org/10.25921/1h9f-nb73>. Last Accessed [21 June 2022], 2022

Lauvset, S. K., Lange, N., Tanhua, T., Bittig, H. C., Olsen, A., Kozyr, A., Álvarez, M., Becker, S., Brown, P. J., Carter, B. R., Cotrim da Cunha, L., Feely, R. A., van Heuven, S., Hoppema, M., Ishii, M., Jeansson, E., Jutterström, S., Jones, S. D., Karlsen, M. K., Lo Monaco, C., Michaelis, P., Murata, A., Pérez, F. F., Pfeil, B., Schirnick, C., Steinfeldt, R., Suzuki, T., Tilbrook, B., Velo, A., Wanninkhof, R., Woosley, R. J., and Key, R. M.: An updated version of the global interior ocean biogeochemical data product, GLODAPv2.2021, *Earth Syst. Sci. Data*, 13, 5565–5589, <https://doi.org/10.5194/essd-13-5565-2021>, 2021.

Pfeil, B., Olsen, A., Bakker, D. C. E., Hankin, S., Koyuk, H., Kozyr, A., Malczyk, J., Manke, A., Metzl, N., Sabine, C. L., Akl, J., Alin, S. R., Bates, N., Bellerby, R. G. J., Borges, A., Boutin, J., Brown, P. J., Cai, W.-J., Chavez, F. P., Chen, A., Cosca, C., Fassbender, A. J., Feely, R. A., González-Dávila, M., Goyet, C., Hales, B., Hardman-Mountford, N., Heinze, C., Hood, M., Hoppema, M., Hunt, C. W., Hydes, D., Ishii, M., Johannessen, T., Jones, S. D., Key, R. M., Körtzinger, A., Landschützer, P., Lauvset, S. K., Lefèvre, N., Lenton, A., Lourantou, A., Merlivat, L., Midorikawa, T., Mintrop, L., Miyazaki, C., Murata, A., Nakadate, A., Nakano, Y., Nakaoka, S., Nojiri, Y., Omar, A. M., Padin, X. A., Park, G.-H., Paterson, K., Perez, F. F., Pierrot, D., Poisson, A., Ríos, A. F., Santana-Casiano, J. M., Salisbury, J., Sarma, V. V. S. S., Schlitzer, R., Schneider, B., Schuster, U., Sieger, R., Skjelvan, I., Steinhoff, T., Suzuki, T., Takahashi, T., Tedesco, K., Telszewski, M., Thomas, H., Tilbrook, B., Tjiputra, J., Vandemark, D., Veness, T., Wanninkhof, R., Watson, A. J., Weiss, R., Wong, C. S., and Yoshikawa-Inoue, H.: A uniform, quality controlled Surface Ocean CO<sub>2</sub> Atlas (SOCAT), *Earth Syst. Sci. Data*, 5, 125-143, doi:10.5194/essd-5-125-2013, 2013.

Reynolds, R. W., Rayner, N. A., Smith, T. M., Stokes, D. C., and Wang, W.: An improved in situ and satellite SST analysis for climate. *J. Clim.* 15, 1609–1625. [https://doi.org/10.1175/1520-0442\(2002\)015<1609:AIISAS>2.0.CO;2](https://doi.org/10.1175/1520-0442(2002)015<1609:AIISAS>2.0.CO;2), 2002.

Schlitzer, R.: Ocean Data View, Ocean Data View, <http://odv.awi.de> (last access: 13 March 2019), 2018.
